# Supplementary material for: Catalog of Differentially Expressed Long Non-Coding RNA following Activation of Human and Mouse Innate Immune Response
Source: PubMed Central journal article supplement (PMC5581803; doi:10.3389/fimmu.2017.01038), 2017-08-29

(A)

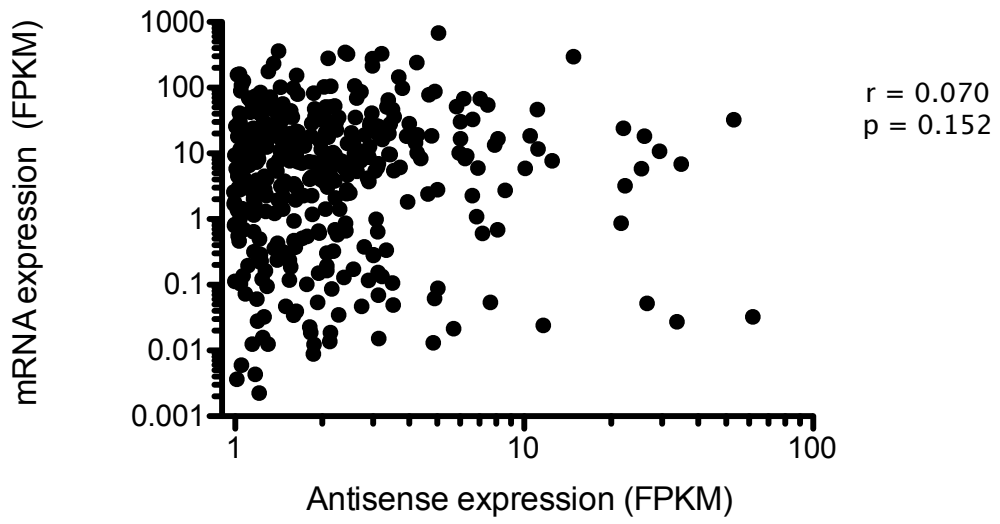

(B)

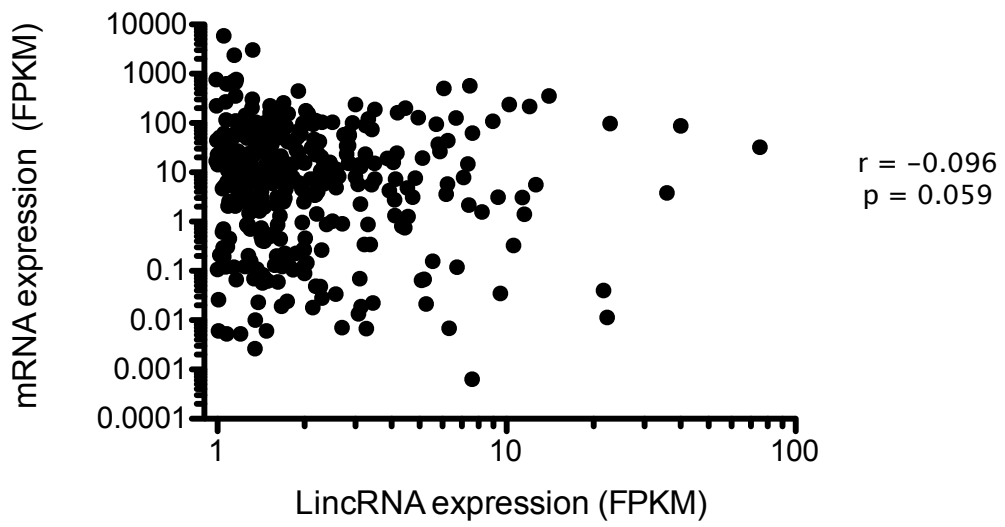

(C)

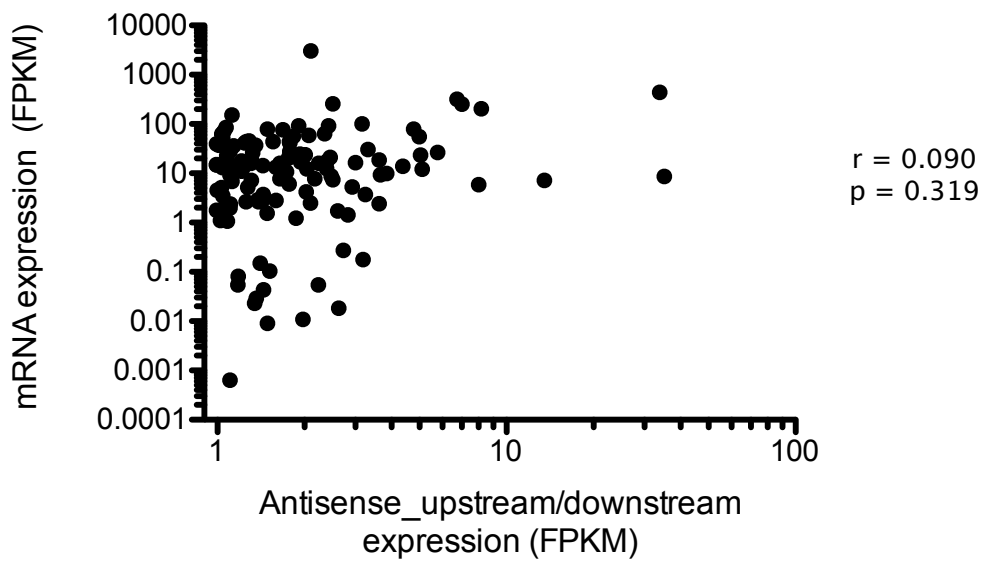

Supplement: data_sheet_2.pdf [file data_sheet_2.pdf]
